# Supplementary material for: Nopinone-based aggregation-induced emission (AIE)-active difluoroboron β-diketonate complex: photophysical, electrochemical and electroluminescence properties
Source: Royal Society of Chemistry journal article supplement (doi:10.1039/c8ra05031g), 2018-01-01

### Supplementary data

Fig. S1 X-Ray crystal structure of compound **2a**.

Fig. S2 Cyclic voltammograms of **3a-3d**.

Fig. S3 The TG curves of **3a-3d**.

Fig. S4 PL spectra of **3a** in DMF/water mixtures with different water fractions.

Fig. S5 PL spectra of **3c** in DMF/water mixtures with different water fractions.

Fig. S6 PL spectra of **3d** in DMF/water mixtures with different water fractions.

Fig. S7 Changes of the maximum PL intensity of **3a-3d** in DMF/water mixtures with different water fraction.

Fig. S8 CIE chromaticity coordinates of Device I (**3b**).

Fig. S1

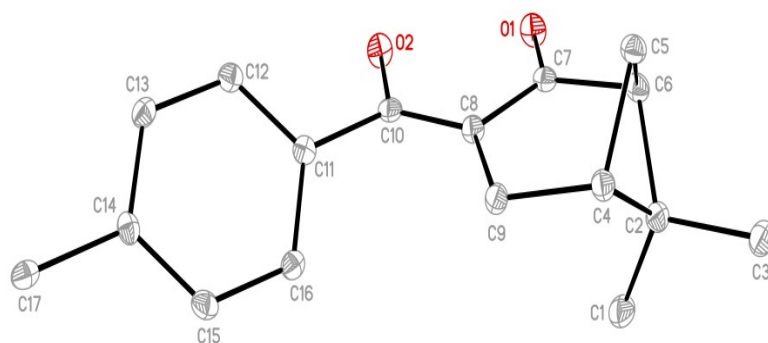

Fig. S2

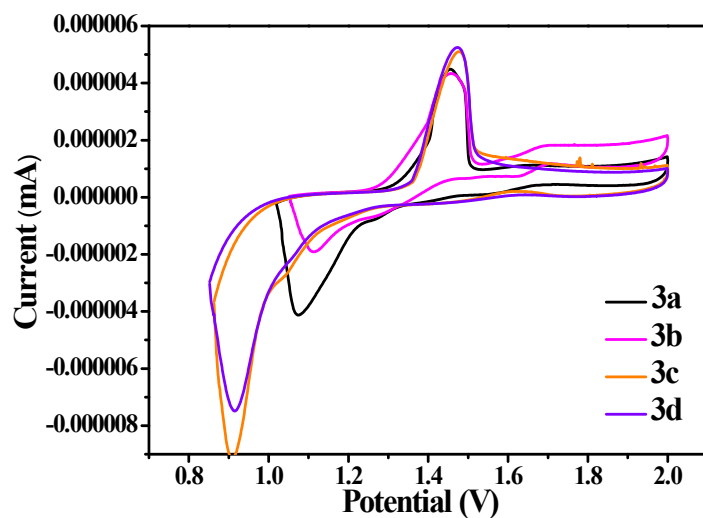

Fig. S3

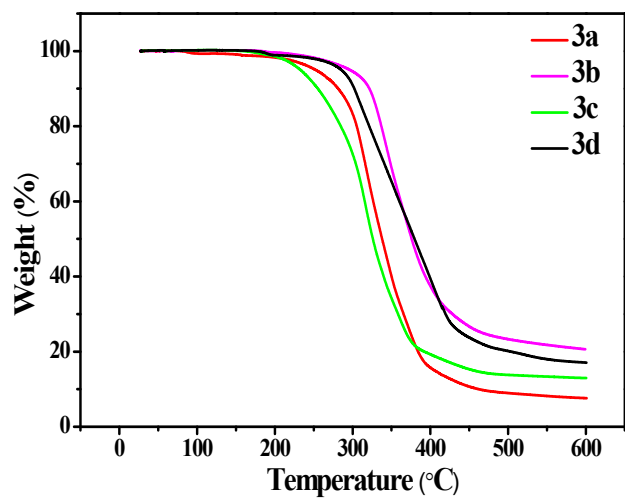

Fig. S4

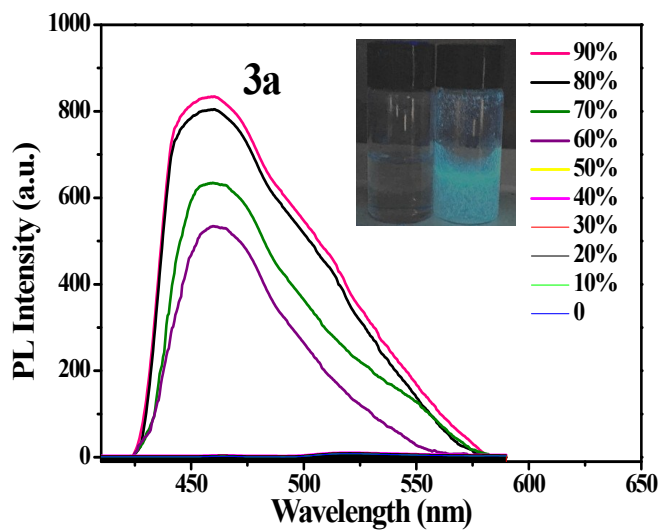

Fig. S5

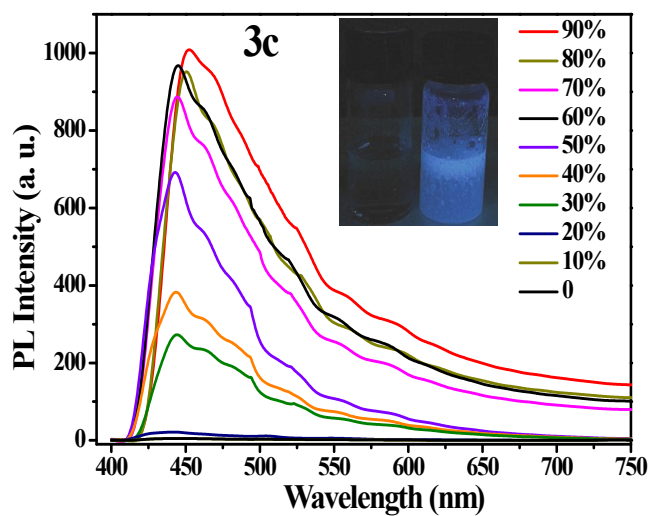

Fig. S6

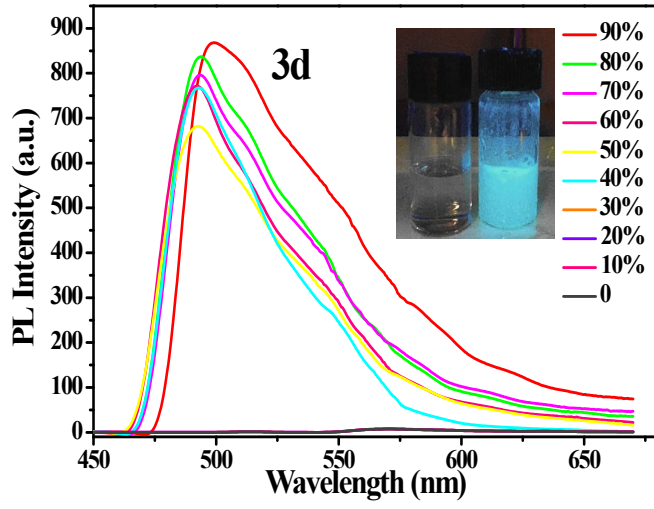

Fig. S7

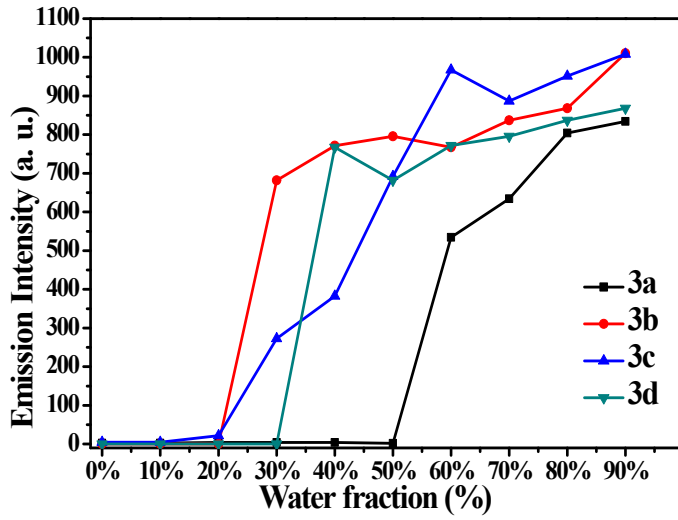

Fig. S8

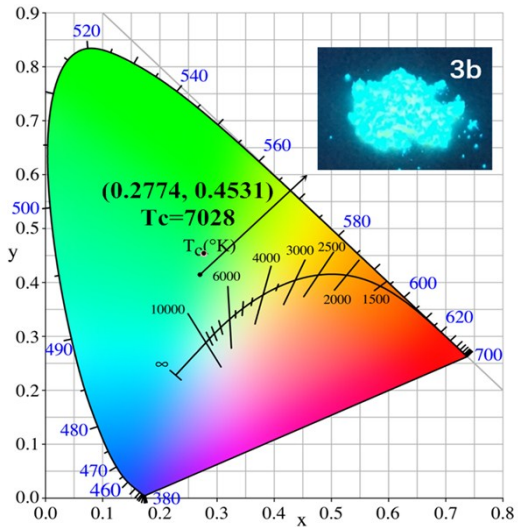

Supplement: c8ra05031g1.pdf [file c8ra05031g1.pdf]
